# Supplementary material for: Changes in water quality and ecosystem processes at extreme summer low flow of 2018 with high-frequency sensors
Source: Copernicus journal article supplement (doi:10.5194/egusphere-2025-656), 2025-02-25
Supplement: Supplementary file 1 [file egusphere-2025-656-supplement.pdf]

1 *Supplement of*

2  
3 **Changes in water quality and ecosystem processes at extreme summer low**  
4 **flow of 2018 with high-frequency sensors**  
5

6 Jingshui Huang<sup>1,2</sup>, Dietrich Borchardt<sup>1</sup>, and Michael Rode<sup>1,3</sup>

7 <sup>1</sup>Department of Aquatic Ecosystem Analysis, Helmholtz Centre for Environmental Research –  
8 UFZ, Brueckstrasse 3a, 39114 Magdeburg, Germany

9 <sup>2</sup>Chair of Hydrology and River Basin Management, Technical University of Munich,  
10 Arcisstrasse 21, 80333 Munich, Germany

11 <sup>3</sup>Institute of Environmental Science and Geography, University of Potsdam, Karl-Liebknecht-  
12 Strasse 24–25, 14476 Potsdam-Golm, Germany

13  
14 *Correspondence to:* Jingshui Huang ([jingshui.huang@tum.de](mailto:jingshui.huang@tum.de))

15  
16 Supplementary Information includes Figures S1-S3.

17

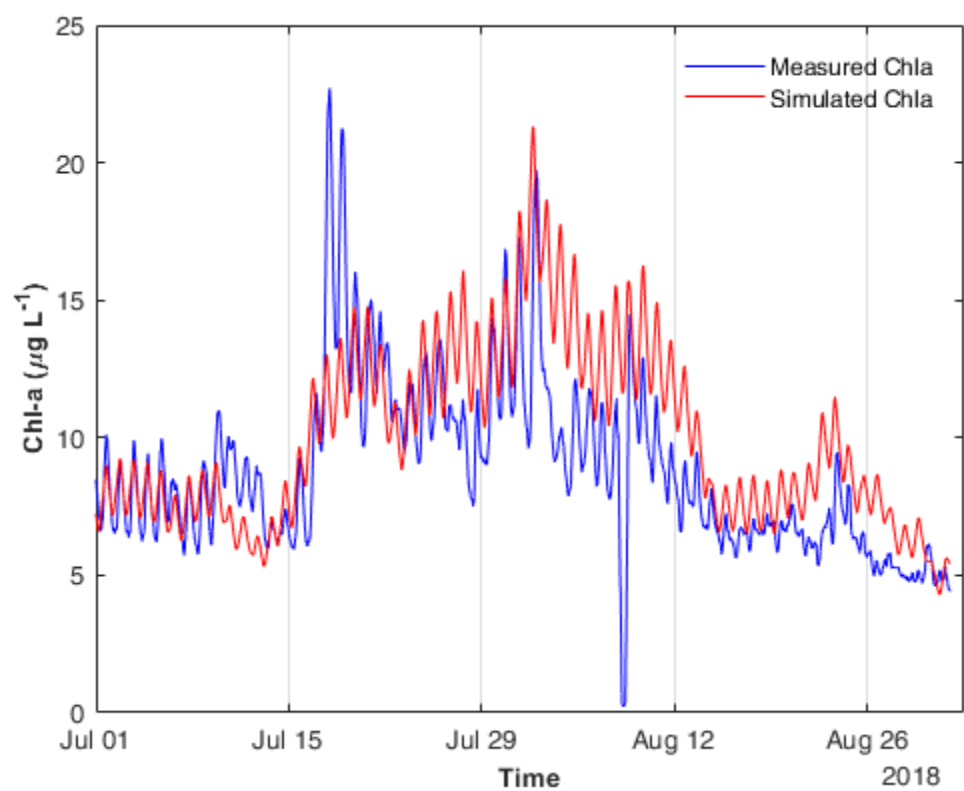

**Fig. S1** Measured and simulated Chl a concentration in the ExLF period at the STF station.

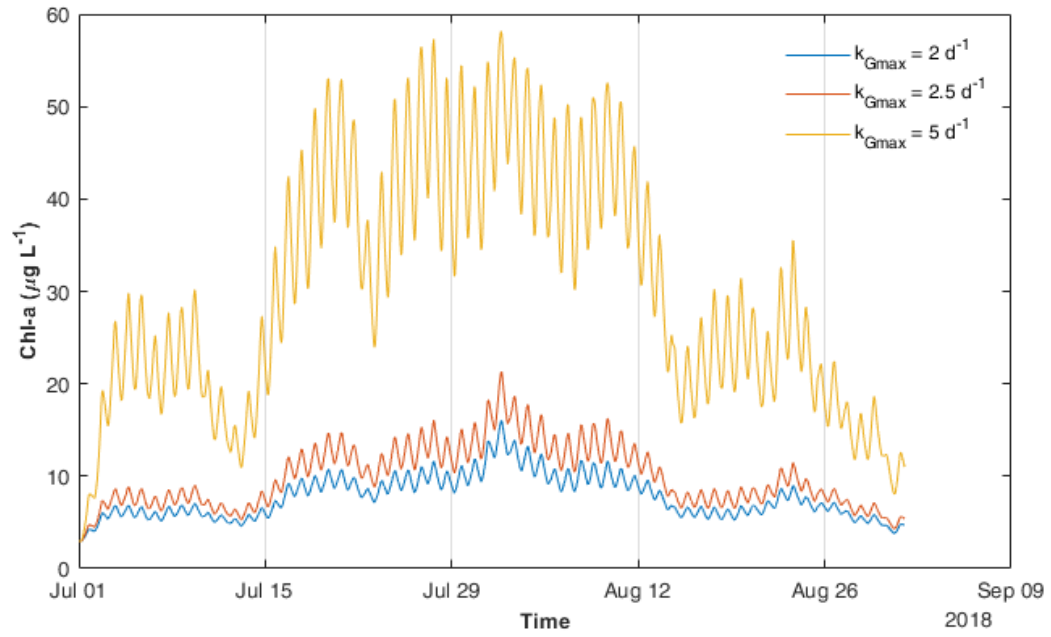

**Fig. S2** Simulated Chl *a* concentrations in the ExLF period at STF with different values of phytoplankton maximum growth rate constant at 20°C ( $k_{Gmax}$ ) applied to the water quality model in Huang et al. (2022). The optimal value for  $k_{Gmax}$  is 2.5 d<sup>-1</sup> in the original model set-up in Huang et al. (2022). With the changing  $k_{Gmax}$  values, both the overall Chl *a* concentrations and the diurnal delta of the concentration changed accordingly.

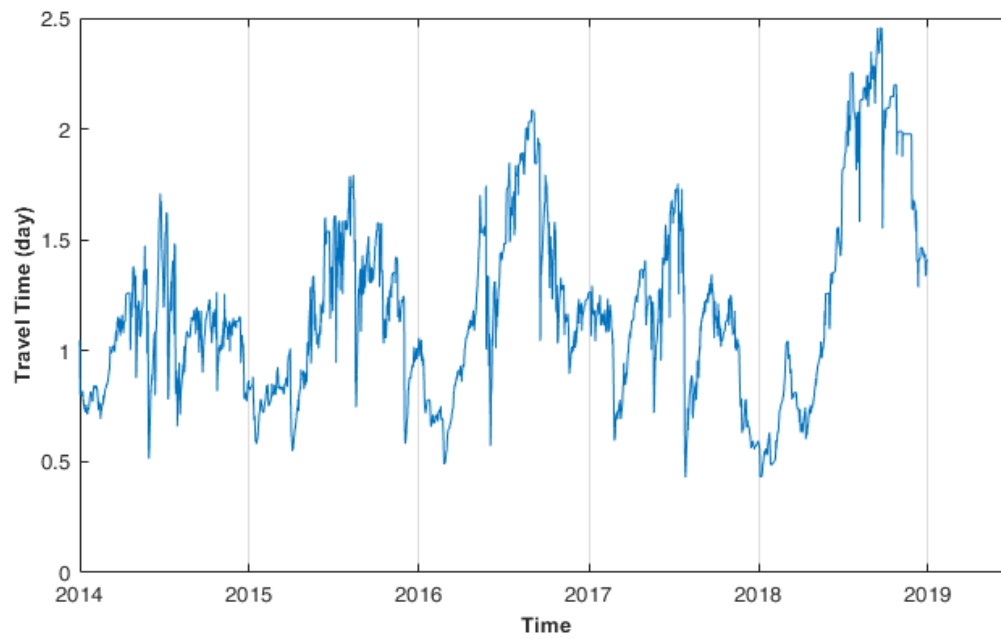

29

30 **Fig. S3** Water travel time from GGL to STF in the Lower Bode reach in 2014-2018.

31   **References**

- 32   Huang, J., Borchardt, D. and Rode, M. 2022. How do inorganic nitrogen processing pathways  
33   change quantitatively at daily, seasonal, and multiannual scales in a large agricultural stream?  
34   Hydrol. Earth Syst. Sci. 26(22), 5817-5833.
